# Supplementary material for: New reactions in water: metal-free conversion of alcohols and ketones into α-iodoketones
Source: Royal Society of Chemistry journal article supplement (doi:10.1039/b411227j), 2004-01-01
Supplement: b411227j.pdf [file b411227j.pdf]

## Supporting Information

### **New reactions in water: metal-free conversion of alcohols and ketones into $\alpha$ -iodoketones**

**José Barluenga,\* María Marco-Arias, Francisco González-Bobes, Alfredo Ballesteros and José M. González.<sup>a</sup>**

*Instituto de Química Organometálica "Enrique Moles", Universidad de Oviedo, Oviedo, 33006, Spain.*

*Fax: (+34) 985103450 ; Tel: (+34) 985104350 ; e-mail: barluenga@uniovi.es*

Typical procedure for:

Iodination of ketones.

Cycloheptanone (5 mmol, 1 equiv, 0.56 g) was added to a solution of NaI (5.15 mmol, 1.03 equiv, 0.77 g) in water (15 mL). The flask was cooled down in an ice-water-bath and H<sub>2</sub>SO<sub>4</sub> (20 mmol, 8 equiv, 1.06 mL) and H<sub>2</sub>O<sub>2</sub> 33 % solution (30 mmol, 6 equiv, 3 mL) were sequentially added. The resulting mixture was heated in an oil bath (40°C) over 7 h. The reaction mixture was then allowed to cool, transferred to a separation funnel and extracted with CH<sub>2</sub>Cl<sub>2</sub> (3x25 mL). The combined organic layers were washed with H<sub>2</sub>O (2x50 mL) and Na<sub>2</sub>S<sub>2</sub>O<sub>3</sub> 5 % solution in water (2x50 mL) and dried over anhydrous sodium sulfate. Concentration of solvents affords crude 2-iodocycloheptanone which was further purified by reduced pressure (64°C, ~10<sup>-3</sup> mm Hg) distillation (4.6 mmol, 1.1 g, 92 %).

Tandem oxidation-halogenation reaction:

Cyclododecanol (5 mmol, 1 equiv, 0.92 g), NaI (5.25 mmol, 1.05 equiv, 0.78 g) and H<sub>2</sub>O (40 mL) were placed in a 100 mL round-bottomed flask which was cooled in an ice-water bath. Amberlyst-15-wet<sup>®</sup> (2.5 g) and H<sub>2</sub>O<sub>2</sub> 33 % solution (0.1 mol, 20 equiv, 10 mL) were sequentially added and the resulting mixture was heated in an oil bath (60°C) over 16 h. The mixture was then allowed to cool and the solid resin was recovered upon filtration and washed with CH<sub>2</sub>Cl<sub>2</sub> (2x5 mL). The filtrate was transferred to a separation funnel and the aqueous phase was further extracted with CH<sub>2</sub>Cl<sub>2</sub> (4x25 mL). The combined organic layers were sequentially washed with H<sub>2</sub>O (2x50 mL), Na<sub>2</sub>S<sub>2</sub>O<sub>3</sub> 5 % solution in water (2x50 mL) and H<sub>2</sub>O (2x50 mL) and dried over anhydrous sodium sulfate. Evaporation of the solvent followed by column chromatography (hexane/CH<sub>2</sub>Cl<sub>2</sub>:3/1) gives rise to 2-iodocyclododecanone (4.5 mmol, 1.4 g, 90 %); m.p. = 50-53°C (from pentane) [(lit. 52-52.5°C)].<sup>1</sup>

<sup>1</sup> G. M. Rubbottom, R. C. Mott, H. D. Juve, Jr., *J. Org. Chem.* **1981**, *46*, 2717.
